# Supplementary material for: A Robust and Highly Efficient Approach for Isolation of Mesenchymal Stem Cells from Wharton’s Jelly for Tissue Repair
Source: Research Square preprint supplement (doi:10.21203/rs.3.rs-882696/v1), 2021-09-20
Supplement: Supplementary file 1 [file 94fadf7fae36a55dec881227.docx]

**Supplemental table 1. Sequences of real-time PCR primers**

| **Gene name** | **Forward sequence** | **Reverse sequence** |
| --- | --- | --- |
| **COL1A1** | CAGACTGGCAACCTCAAGAA | CAGTGACGCTGTAGGTGAAG |
| **COL2A1** | CAGGATGGGCAGAGGTATAATG | GAGGCAGTCTTTCACGTCTT |
| **COL3A1** | GCTCTGCTTCATCCCACTATTA | CTGGCTTCCAGACATCTCTATC |
| **COL4A1** | ACCAGGACAAGCTCAAGTTC | TTTCCGGGTTCACCTTTCTC |
| **COL5A1** | CGCTTACAGAGTCACCAAAGA | TCACAGTTGTTAGGATGGAGAAG |
| **COL6A1** | CCTCGTGGACAAAGTCAAGT | ATCTCCACCTCGTCACTGTA |
| **GAPDH** | GAGTCAACGGATTTGGTCGT | TTGATTTTGGAGGGATCTCG |
